# Supplementary material
Source: PubMed Central journal article supplement (PMC3985931)
Supplement: ct4011129_si_001.pdf [file ct4011129_si_001.pdf]

## Supporting Information

### **A comparative study of transferable theoretical aspherical pseudoatom data bank and classical force field in predicting the coulombic interaction in molecular dimers.**

Prashant Kumar<sup>1</sup>, Slawomir Bojarowski<sup>1</sup>, Katarzyna N. Jarzemska<sup>1</sup>, Slawomir Domagała<sup>1</sup>, Kenno Vanommeslaeghe<sup>2</sup>, Alexander D. MacKerell Jr.<sup>2</sup> and Paulina M. Dominiak<sup>1\*</sup>

<sup>1</sup>*Faculty of chemistry, University of Warsaw, Pasteura 1, 02-093 Warsaw, Poland*

<sup>2</sup>*Department of Pharmaceutical Sciences, University of Maryland School of Pharmacy, 20 Penn Street HSF II, Baltimore, Maryland 21201, United States*

---

\*Electronic address: pdomin@chem.uw.edu.pl

**Electrostatic interaction using SPDFG**

This method is based on a set of orthogonal (Rys) polynomials, which yields a simple general formula for integrals over basis functions,  $X$ , of arbitrarily high angular momentum:

$$\langle X_i(1)X_j(1)|r_{12}^{-1}|X_k(2)X_l(2)\rangle = \sum_{\alpha=1}^N I_x(U_\alpha)I_y(U_\alpha)I_z^*(U_\alpha)W_\alpha \quad (1)$$

In which  $U_\alpha$  and  $W_\alpha$  are the roots and weights of the  $N^{\text{th}}$  order Rys polynomial and  $I_x$ ,  $I_y$ , and  $I_z^*$  are simple two dimensional integrals, evaluated using efficient and compact recurrence formulas(1).

To calculate reference energy particularly S66 dataset, this was calculated using the standard aug-cc-pVTZ basis set. This calculation was performed by Hobza and co-workers at Prague laboratory.

Table I: Statistics from energies computed from SPDFG, compared with DFT-SAPT( $E_{POL}$ ) for S66 dataset.

| Statistical Descriptors     | SPDFG |
|-----------------------------|-------|
| R <sup>2</sup>              | 0.99  |
| Slope                       | 1.0   |
| RMSE kcal mol <sup>-1</sup> | 0.5   |
| MAE kcal mol <sup>-1</sup>  | 0.4   |
| ME kcal mol <sup>-1</sup>   | 0.2   |
| % Error                     | 4     |

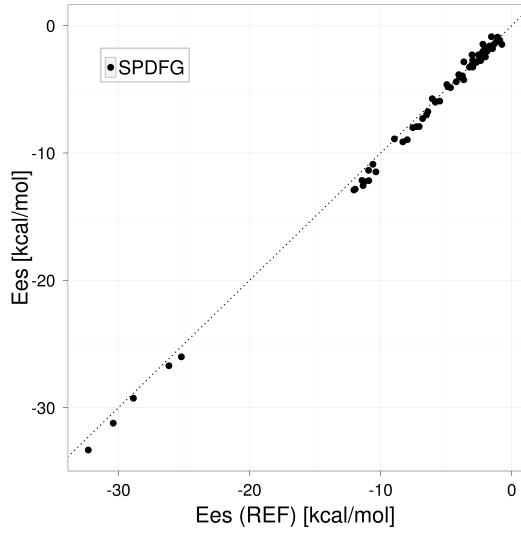

Figure 1: Comparison of Electrostatic Interaction Energies Computed from SPDFG to the DFT-SAPT, for the S66 Dataset.

## DFT-SAPT

$$E^{SAPT} = E_{elst}^{(1)} + E_{exch-r}^{(1)} + E_{ind}^{(2)} + E_{exch-ind}^{(2)} + E_{disp}^{(2)} + E_{exch-disp}^{(2)} + \delta(HF) \quad (2)$$

Where denoted terms are,  $E_{elst}$ , electrostatic;  $E_{exch-r}$ , Pauli exchange repulsion;  $E_{ind}$ , induction;  $E_{ind}$ , dispersion;  $E_{exch-ind}$  and  $E_{exch-disp}$  exchange counterparts of induction and dispersion and higher order induction and electrostatic are summed in  $\delta(HF)$ .

## S66×8 Dataset

Table II: Statistics from Computed Electrostatic energy for the S66×8 Dataset at fractions of equilibrium distance.

| Statistical descriptors                         | UBDB+EPMM | AM1-BCC | RESP/HF/6-31G* | RESP/HF/6-31G* | CGenFF |
|-------------------------------------------------|-----------|---------|----------------|----------------|--------|
| <b>Fraction of .90 to equilibrium distance</b>  |           |         |                |                |        |
| $R^2$                                           | 0.97      | 0.90    | 0.89           | 0.92           | 0.86   |
| RMSE(kcal mol <sup>-1</sup> )                   | 1.8       | 7.9     | 7.3            | 5.2            | 8.2    |
| MAE(kcal mol <sup>-1</sup> )                    | 1.4       | 6.5     | 6.0            | 4.4            | 6.6    |
| ME (kcal mol <sup>-1</sup> )                    | 0.2       | 6.5     | 6.0            | 4.4            | 6.6    |
| % Error                                         | 3         | 69      | 64             | 54             | 70     |
| <b>Fraction of .95 to equilibrium distance</b>  |           |         |                |                |        |
| $R^2$                                           | 0.97      | 0.94    | 0.93           | 0.94           | 0.90   |
| RMSE(kcal mol <sup>-1</sup> )                   | 1.4       | 5.8     | 5.3            | 3.3            | 6.0    |
| MAE(kcal mol <sup>-1</sup> )                    | 1.1       | 4.5     | 4.0            | 2.8            | 4.6    |
| ME(kcal mol <sup>-1</sup> )                     | 0.2       | 4.5     | 4.0            | 2.7            | 4.6    |
| % Error                                         | 1         | 66      | 61             | 49             | 68     |
| <b>At equilibrium distance</b>                  |           |         |                |                |        |
| $R^2$                                           | 0.97      | 0.95    | 0.95           | 0.96           | 0.92   |
| RMSE(kcal mol <sup>-1</sup> )                   | 1.2       | 4.3     | 3.9            | 2.1            | 4.6    |
| MAE(kcal mol <sup>-1</sup> )                    | 0.8       | 3.2     | 2.8            | 1.7            | 3.3    |
| ME(kcal mol <sup>-1</sup> )                     | 0.3       | 3.2     | 2.8            | 1.6            | 3.3    |
| % Error                                         | 3         | 63      | 57             | 44             | 66     |
| <b>Fraction of 1.05 to equilibrium distance</b> |           |         |                |                |        |
| $R^2$                                           | 0.97      | 0.96    | 0.96           | 0.96           | 0.93   |
| RMSE(kcal mol <sup>-1</sup> )                   | 1.1       | 3.3     | 2.9            | 1.4            | 3.6    |
| MAE(kcal mol <sup>-1</sup> )                    | 0.8       | 2.3     | 2.0            | 1.1            | 3.4    |
| ME(kcal mol <sup>-1</sup> )                     | 0.3       | 2.3     | 1.9            | 0.8            | 2.4    |
| % Error                                         | 3         | 61      | 55             | 44             | 67     |
| <b>Fraction of 1.10 to equilibrium distance</b> |           |         |                |                |        |
| $R^2$                                           | 0.98      | 0.96    | 0.97           | 0.97           | 0.94   |
| RMSE(kcal mol <sup>-1</sup> )                   | 1.0       | 2.6     | 2.2            | 1.0            | 2.8    |
| MAE(kcal mol <sup>-1</sup> )                    | 0.7       | 1.7     | 1.4            | 0.8            | 1.8    |
| ME(kcal mol <sup>-1</sup> )                     | 0.5       | 1.7     | 1.3            | 0.3            | 1.8    |
| % Error                                         | 0.2       | 66      | 65             | 52             | 82     |
| <b>Fraction of 1.25 to equilibrium distance</b> |           |         |                |                |        |
| $R^2$                                           | 0.98      | 0.97    | 0.97           | 0.97           | 0.95   |
| RMSE(kcal mol <sup>-1</sup> )                   | 0.8       | 1.3     | 1.0            | 0.8            | 1.5    |
| MAE(kcal mol <sup>-1</sup> )                    | 0.5       | 0.7     | 0.6            | 0.5            | 0.8    |
| ME(kcal mol <sup>-1</sup> )                     | 0.4       | 0.7     | 0.4            | -0.3           | 0.8    |
| % Error                                         | -13       | 76      | 100            | 91             | 179    |
| <b>Fraction of 1.50 to equilibrium distance</b> |           |         |                |                |        |
| $R^2$                                           | 0.98      | 0.97    | 0.98           | 0.98           | 0.95   |
| RMSE(kcal mol <sup>-1</sup> )                   | 0.6       | 0.5     | 0.3            | 0.8            | 0.6    |
| MAE(kcal mol <sup>-1</sup> )                    | 0.3       | 0.3     | 0.2            | 0.5            | 0.3    |
| ME(kcal mol <sup>-1</sup> )                     | 0.3       | 0.2     | 0.1            | -0.4           | 0.3    |
| % Error                                         | 28        | 19      | 22             | -16            | 212    |
| <b>Fraction of 2.00 to equilibrium distance</b> |           |         |                |                |        |
| $R^2$                                           | 0.98      | 0.98    | 0.98           | 0.98           | 0.95   |
| RMSE(kcal mol <sup>-1</sup> )                   | 0.4       | 0.3     | 0.2            | 0.7            | 0.5    |
| MAE(kcal mol <sup>-1</sup> )                    | 0.2       | 0.2     | 0.1            | 0.4            | 0.3    |
| ME(kcal mol <sup>-1</sup> )                     | 0.2       | 0.1     | -0.1           | -0.4           | 0.2    |
| % Error                                         | 49        | 26      | 12             | -14            | -47    |

## Electrostatic Potential

Table III: Comparison of the potential at the vdW surface between REF and other models for the S66 and JSCH-2005 Datasets. The discrepancies  $\Delta V/V$  quantity defined as  $[V - V_{REF}/V_{REF}]$ .

| $\Delta V/V$ |  | UBDB   | AM1-BCC | RESP/SCF/6-31G* | CHARMM |
|--------------|--|--------|---------|-----------------|--------|
| C39/C6       |  | -0.120 | 0.792   | 0.693           | 0.810  |
| W37          |  | 0.439  | 2.12    | 1.78            | 1.92   |
| V5           |  | 0.177  | 0.914   | 0.774           | 0.962  |
| L33          |  | 0.133  | 0.897   | 0.703           | 0.902  |
| K46          |  | 0.129  | 1.015   | 0.909           | 1.032  |
| m-cytosine   |  | 0.308  | 1.825   | 1.605           | 1.507  |
| m-thymine    |  | 0.225  | 0.741   | 0.713           | 0.851  |
| Inosine      |  | 0.282  | 1.306   | 1.347           | 1.583  |
| Am-adenine   |  | 1.878  | 12.779  | 11.259          | 12.331 |
| F-toluene    |  | 0.089  | 1.259   | 1.141           | 1.116  |
| Y13/Y4       |  | 0.021  | 1.137   | 0.936           | 0.916  |
| Th-uracil    |  | 0.253  | 0.686   | 0.699           | 0.907  |
| Th-guanine   |  | 0.320  | 1.767   | 1.712           | 1.993  |
| Adenine      |  | 0.221  | 0.896   | 0.803           | 1.003  |
| Cytosine     |  | 0.611  | 1.390   | 1.315           | 1.336  |
| Guanine      |  | 0.536  | 1.688   | 1.617           | 1.634  |
| M-adenine    |  | 0.703  | 2.973   | 2.649           | 2.321  |
| M-guanine    |  | 0.377  | 1.584   | 1.432           | 1.432  |
| PBV5C6       |  | 0.126  | 1.202   | 1.189           | 1.322  |
| F30/F49      |  | 0.210  | 1.277   | 1.058           | 1.126  |
| Thiouracil   |  | -0.079 | 0.629   | 0.654           | 0.895  |
| Thymine      |  | 0.266  | 0.688   | 0.719           | 0.956  |
| Water        |  | 0.162  | 1.114   | 1.114           | 1.114  |
| AcNH2        |  | 0.150  | 0.906   | 1.104           | 1.094  |
| AcOH         |  | 0.071  | 1.015   | 0.945           | 0.941  |
| Benzene      |  | 0.403  | 2.147   | 2.158           | 2.016  |
| Cyclopentane |  | 0.276  | 1.195   | 0.948           | 0.941  |
| Ethene       |  | 0.263  | 1.339   | 1.535           | 1.654  |
| Ethyne       |  | 0.816  | 1.1492  | 1.915           | 1.460  |
| MeNH2        |  | 0.390  | 1.330   | 1.271           | 1.522  |
| MeOH         |  | 0.228  | 1.171   | 1.119           | 1.272  |
| Neopentane   |  | -0.013 | 1.087   | 0.976           | 1.409  |
| Pentane      |  | 0.189  | 1.168   | 0.967           | 1.667  |
| Peptide      |  | 0.165  | 1.182   | 1.291           | 1.351  |
| Pyridine     |  | 0.367  | 1.424   | 1.560           | 1.602  |
| Uracil       |  | 0.286  | 0.630   | 0.638           | 0.823  |
| Average      |  | 0.244  | 1.164   | 1.174           | 1.306  |

Table IV: Grid Statistics from electrostatic potential at vdW surface for accuracy of grid estimation.

| Statistical Descriptors | UBDB  | AM1-BCC | RESP  | CGenFF |
|-------------------------|-------|---------|-------|--------|
| Mean( $e/a_0$ )         | 0.012 | 0.012   | 0.011 | 0.017  |
| Min( $e/a_0$ )          | 0.003 | 0.007   | 0.006 | 0.008  |
| Max( $e/a_0$ )          | 0.03  | 0.02    | 0.02  | 0.5    |

## Dipole Moments

Table V: Dipole enhancements  $\Delta\mu(\%)$  and discrepancy of quantities defined as  $\Delta\mu/\mu$  for the S66 and JSCH-2005 dataset. The statistics between the different methods are given  $\Delta\mu(\%) = 100 \times (\mu - \mu_{REF})/\mu_{REF}$ ;  $\text{RMS}(\mu - \mu_{REF})$  is the Root Mean Square Error between  $\mu$  and  $\mu_{REF}$ . The discrepancy factor is defined here as:  $\Delta\mu/\mu = \sqrt{\left[\frac{\sum_1^N(\mu - \mu_{REF})^2}{N}\right] / [\text{RMS}(\mu) \cdot \text{RMS}(\mu_{REF})]}$

| Statistical descriptors       | REF  | UBDB   | AM1-BCC | RESP   | CHARMM |
|-------------------------------|------|--------|---------|--------|--------|
| <b>JSCH 2005 Data set</b>     |      |        |         |        |        |
| $\Delta\mu(\%)$               |      | 12     | 5       | 10     | 31     |
| $\text{RMS}(\mu)$             | 6.80 | 8.49   | 9.70    | 10.84  | 11.90  |
| $\text{RMS}(\mu - \mu_{REF})$ |      | 0.80   | 0.51    | 0.54   | 1.19   |
| $R^2(\mu, \mu_{REF})$         |      | 0.88   | 0.92    | 0.98   | 0.76   |
| $\Delta\mu/\mu$               |      | 10.54% | 6.38%   | 6.32%  | 13.26% |
| <b>S66 Data set</b>           |      |        |         |        |        |
| $\Delta\mu(\%)$               |      | -1     | 35      | 15     | 17     |
| $\text{RMS}(\mu)$             | 2.23 | 2.21   | 2.83    | 2.48   | 2.55   |
| $\text{RMS}(\mu - \mu_{REF})$ |      | 0.13   | 0.87    | 0.31   | 0.52   |
| $R^2(\mu, \mu_{REF})$         |      | 0.99   | 0.83    | 0.99   | 0.97   |
| $\Delta\mu/\mu$               |      | 5.88%  | 32.26%  | 13.44% | 22.08% |

Table VI: Statistics from computed dipole moment magnitudes from RESP-SCRF point charge model for single molecules from the S66 dataset.

| Statistical Descriptors | RESP-SCRF |
|-------------------------|-----------|
| $R^2$                   | 0.99      |
| Slope                   | 0.71      |
| RMSE Debye              | 0.86      |
| MAE Debye               | 0.58      |
| ME Debye                | 0.56      |

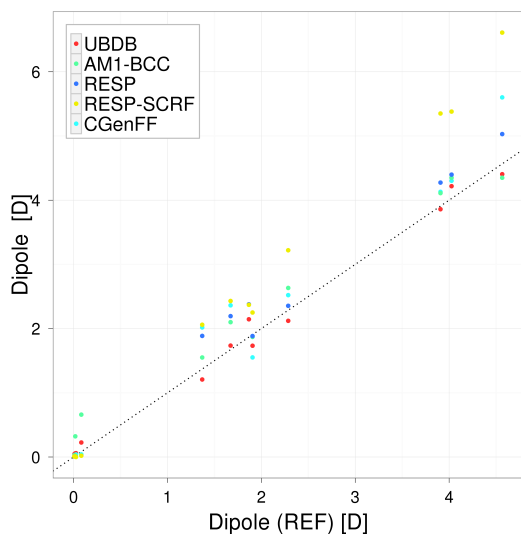

Figure 2: Isolated molecules dipole moments computed from tested methods are compared with those computed directly from the electronic wavefunction from B3LYP/aug-cc-pVTZ calculations (REF) for S66 dataset.

### Molecular geometries

Table VII: Description of type of interaction present in molecular geometries of JSCH-2005 dataset.

| Complex                               | Abbreviations     | Geometry | Monomer name                 |
|---------------------------------------|-------------------|----------|------------------------------|
| <b>Hydrogen bonded DNA base pairs</b> |                   |          |                              |
| 1012_GCWC1                            | G...C WC          | Planar   | cytosine-guanine             |
| 1013_mGmCWC                           | mG...mC WC        | Planar   | methylcytosine-methylguanine |
| 1014_ATWC                             | A...T WC          | Planar   | adenine-thymine              |
| 1015_mAmTH                            | mA...mT H         | Planar   | methyladenine-methylthymine  |
| 1016_8oxoGCWC8o                       | G...C WC pl       | Planar   | 8-oxoguanine-cytosine        |
| 1017_ICWC                             | I...C WC pl       | Planar   | cytosine-inosine             |
| 1018_GUwobble                         | G...U wobble      | Planar   | guanine-uracil               |
| 1019_CC                               | C...CH+           | Planar   | H3-cytosine+-cytosine        |
| 1020_UUcalcutta                       | U...U Calcutta pl | Planar   | uracil-uracil                |
| 1021_UUpl                             | U...U pl          | Planar   | uracil-uracil                |
| 1022_6thioGCWC                        | 6tG...C WC        | Planar   | cytosine-6-thioguanine       |

Table VII (*continued*)

|                                 |                |        |                              |
|---------------------------------|----------------|--------|------------------------------|
| 1023_A4thioUWC                  | A...4tU WC     | Planar | adenine-4-thiouracil         |
| 1024_2aminoAT                   | 2aminoA...T    | Planar | 2-aminoadenine-thymine       |
| 1025_2aminoATpl                 | 2aminoA...T pl | Planar | 2-aminoadenine-thymine       |
| 1026_AdifluorotolueneWCA...F WC |                | Planar | adenine-difluorotoluene      |
| 1027_G4thioUwobble              | G...4tU        | Planar | guanine-4-thiouracil         |
| 1028_G2thioUwobble              | G...2tU        | Planar | guanine-2-thiouracil         |
| 1029_AC                         | A...C pl       | Planar | cytosine-adenine             |
| 1030_GGHbond                    | G...G pl       | Planar | guanine-guanine              |
| 1031_G6thioG                    | G...6tG pl     | Planar | guanine-6-thioguanine        |
| 1032_6thioGG                    | 6tG...G pl     | Planar | 6-thioguanine-guanine        |
| 1033_GA1                        | G...A 1        | Planar | guanine-adenine              |
| 1034_GA1pl                      | G...A 1pl      | Planar | adenine-guanine              |
| 1035_GA2                        | G...A 2        | Planar | guanine-adenine              |
| 1036_GA2pl                      | G...A 2pl      | Planar | guanine-adenine              |
| 1037_GA3                        | G...A 3        | Planar | guanine-adenine              |
| 1038_GA4                        | G...A 4        | Planar | guanine-adenine              |
| 1039_AA1                        | A...A 1 pl     | Planar | adenine-adenine              |
| 1040_AA2                        | A...A 2 pl     | Planar | adenine-adenine              |
| 1041_AA3                        | A...A 3 pl     | Planar | adenine-adenine              |
| 1042_8oxoGG                     | 8oG...G        | Planar | guanine-8-oxoguanine         |
| 1043_2thioU2thioU               | 2tU...2tU pl   | Planar | 2-thiouracil-2-thiouracil    |
| 1044_mAmTWCAT                   | A...T WC       | Planar | methyladenine-methylthymine  |
| 1045_mGmCWC                     | G...C WC*      | Planar | methylcytosine-methylguanine |
| 1046_mAmTWCAC                   | A...T WC       | Planar | methyladenine-methylthymine  |
| 1047_GAHB                       | G...A HB       | Planar | guanine-adenine              |
| 1048_CGWC                       | C...G WC       | Planar | cytosine-guanine             |
| 1049_GCWC2                      | G...C WC       | Planar | guanine-cytosine             |

**Interstand base pairs**

|                      |                   |             |                   |
|----------------------|-------------------|-------------|-------------------|
| 1050_GG0336CGis036   | GG0/3.36CGis036   | Interstrand | guanine-cytosine  |
| 1051_GG0336GCis036   | GG0/3.36GCis036   | Interstrand | cytosine-guanine  |
| 1052_AA20305ATis2005 | AA20/3.05ATis2005 | Interstrand | thymine-adenine   |
| 1053_AA20305TAis2005 | AA20/3.05TAis2005 | Interstrand | adenine-thymine   |
| 1054_GC0325CCis      | GC0/3.25C//Cis    | Interstrand | cytosine-cytosine |
| 1055_GC0325GGis      | GC0/3.25G//Gis    | Interstrand | guanine-guanine   |
| 1056_CG0319GGis      | CG0/3.19G//Gis    | Interstrand | cytosine-cytosine |
| 1057_CG0319CCis      | CG0/3.19CCis      | Interstrand | guanine-guanine   |
| 1058_GA10315ACis     | GA10/3.15A//Cis   | Interstrand | adenine-cytosine  |



Table VII (*continued*)

|                           |                 |             |                               |
|---------------------------|-----------------|-------------|-------------------------------|
| 1059_GA10315TGis          | GA10/3.15T//Gis | Interstrand | thymine-guanine               |
| 1060_AG08319TGis          | AG08/3.19T//Gis | Interstrand | guanine-thymine               |
| 1061_AG08319ACis          | AG08/3.19A//Cis | Interstrand | adenine-cytosine              |
| 1062_TG0319AGis           | TG03.19A//Gis   | Interstrand | adenine-guanine               |
| 1063_TG0319TCis           | TG03.19T//Cis   | Interstrand | thymine-cytosine              |
| 1064_GT10315TCis          | GT10/3.15T//Cis | Interstrand | thymine-cytosine              |
| 1065_GT10315AGis          | GT10/3.15A//Gis | Interstrand | adenine-guanine               |
| 1066_AT10326TTis          | AT10/3.26T//Tis | Interstrand | thymine-thymine               |
| 1067_AT10326AAis          | AT10/3.26A//Ais | Interstrand | adenine-adenine               |
| 1068_TA08316AAis          | TA08/3.16A//Ais | Interstrand | adenine-adenine               |
| 1069_TA08316TTis          | TA08/3.16T//Tis | Interstrand | thymine-thymine               |
| 1070_AA0324ATis           | AA0/3.24A//Tis  | Interstrand | adenine-thymine               |
| 1071_AA0324TAis           | AA0/3.24T//Ais  | Interstrand | adenine-thymine               |
| 1072_AA                   | A...A IS        | Interstrand | methyladenine-methyladenine   |
| 1073_TT                   | T...T IS        | Interstrand | thymine-thymine               |
| 1074_GGinterstrand        | G...G IS        | Interstrand | methylguanine-methylguanine   |
| 1075_CC                   | C...C IS        | Interstrand | methylcytosine-methylcytosine |
| 1076_AG                   | A...G IS        | Interstrand | methyladenine-methylguanine   |
| 1077_TC                   | T...C IS        | Interstrand | methylcytosine-thymine        |
| 1078_CA                   | C...A IS        | Interstrand | cytosine-adenine              |
| 1079_GG9                  | G...G IS        | Interstrand | guanine-guanine               |
| 1080_GG10                 | G...G IS        | Interstrand | guanine-guanine               |
| 1081_CC11                 | C...C IS        | Interstrand | cytosine-cytosine             |
| <b>Stacked base pairs</b> |                 |             |                               |
| 1082_GCS                  | G...C S         | Stacked     | guanine-cytosine              |
| 1083_mGmCS                | mG...mC S       | Stacked     | methylguanine-methylcytosine  |
| 1084_ATS1                 | A...T S         | Stacked     | adenine-thymine               |
| 1085_mAmTS                | mA...mT S       | Stacked     | methyladenine-methylthymine   |
| 1086_CC1                  | CC1             | Stacked     | cytosine-cytosine             |
| 1087_CC2                  | CC2             | Stacked     | cytosine-cytosine             |
| 1088_CC3                  | CC3             | Stacked     | cytosine-cytosine             |
| 1089_CC4                  | CC4             | Stacked     | cytosine-cytosine             |
| 1090_CC5                  | CC5             | Stacked     | cytosine-cytosine             |
| 1091_CC6                  | CC6             | Stacked     | cytosine-cytosine             |
| 1092_CC7                  | CC7             | Stacked     | cytosine-cytosine             |
| 1093_CC8                  | CC8             | Stacked     | cytosine-cytosine             |
| 1094_CC9                  | CC9             | Stacked     | cytosine-cytosine             |

Table VII (*continued*)

|                     |                   |         |                              |
|---------------------|-------------------|---------|------------------------------|
| 1095_CC10           | CC10              | Stacked | cytosine-cytosine            |
| 1096_CC11           | CC11              | Stacked | cytosine-cytosine            |
| 1097_CC12           | CC12              | Stacked | cytosine-cytosine            |
| 1098_CC13           | CC13              | Stacked | cytosine-cytosine            |
| 1099_CC14           | CC14              | Stacked | cytosine-cytosine            |
| 1100_AAS            | AAS               | Stacked | adenine-adenine              |
| 1101_GGst           | GGst              | Stacked | guanine-guanine              |
| 1102_ACst           | ACst              | Stacked | adenine-cytosine             |
| 1103_GAst           | GAst              | Stacked | guanine-adenine              |
| 1104_CCst           | CCst              | Stacked | cytosine-cytosine            |
| 1105_AUst           | AUst              | Stacked | adenine-uracil               |
| 1106_GCst           | GCst              | Stacked | guanine-cytosine             |
| 1107_CUst           | CUst              | Stacked | cytosine-uracil              |
| 1108_UUst           | UUst              | Stacked | uracil-uracil                |
| 1109_GUst           | GUst              | Stacked | guanine-uracil               |
| 1110_GG0336GGs036   | GG0/3.36 GGs036   | Stacked | cytosine-cytosine            |
| 1111_GG0336CCs036   | GG0/3.36 CCs036   | Stacked | guanine-guanine              |
| 1112_AA20305AAs2005 | AA20/3.05 AAs2005 | Stacked | adenine-adenine              |
| 1113_AA20305TTs2005 | AA20/3.05 TTs2005 | Stacked | thymine-thymine              |
| 1114_GC0325GCs      | GC0/3.25C//Cis    | Stacked | cytosine-guanine             |
| 1115_CG0319GCs      | CG0/3.19G//Cs     | Stacked | cytosine-guanine             |
| 1116_GA10315AGs     | GA10/3.15A//Gs    | Stacked | adenine-guanine              |
| 1117_GA10315TCs     | GA10/3.15T//Cs    | Stacked | thymine-cytosine             |
| 1118_AG08319AGs     | AG08/3.19A//Gs    | Stacked | adenine-guanine              |
| 1119_AG08319TCs     | AG08/3.19T//Cs    | Stacked | thymine-cytosine             |
| 1120_TG0319TGs      | TG03.19T//Gs      | Stacked | thymine-guanine              |
| 1121_TG0319ACs      | TG03.19A//Cs      | Stacked | adenine-cytosine             |
| 1122_GT10315TGs     | GT10/3.15T//Gs    | Stacked | thymine-guanine              |
| 1123_GT10315ACs     | GT10/3.15A//Cs    | Stacked | adenine-cytosine             |
| 1124_AT10326ATs     | AT10/3.26A//Ts    | Stacked | adenine-thymine              |
| 1125_TA08316ATs     | TA08/3.16A//Ts    | Stacked | adenine-thymine              |
| 1126_AA0324AAs      | AA0/3.24A//As     | Stacked | adenine-adenine              |
| 1127_AA0324TTs      | AA0/3.24T//Ts     | Stacked | thymine-thymine              |
| 1128_ATS2           | A...T S           | Stacked | methyladenine-thymine        |
| 1129_GCS1           | G...C S           | Stacked | methylcytosine-methylguanine |
| 1130_ACS            | A...C S           | Stacked | methyladenine-methylcytosine |
| 1131_TGS            | T...G S           | Stacked | methylthymine-methylguanine  |
| 1132_GCS2           | G...C S           | Stacked | cytosine-guanine             |

Table VII (*continued*)

|                         |                |         |                                    |
|-------------------------|----------------|---------|------------------------------------|
| 1133_AGS                | A...G S        | Stacked | adenine-guanine                    |
| 1134_CGS                | C...G S        | Stacked | guanine-cytosine                   |
| 1135_GCS3               | G...C S        | Stacked | guanine-cytosine                   |
| <b>Amino acid pairs</b> |                |         |                                    |
| 1136_F30K46             | F30-K46        | Aa      | amino acids pairs from Rubredoxine |
| 1137_F30L33             | F30-L33        | Aa      | amino acids pairs from Rubredoxine |
| 1138_F30Y13             | F30-Y13        | Aa      | amino acids pairs from Rubredoxine |
| 1139_F30F49             | F30-F49        | Aa      | amino acids pairs from Rubredoxine |
| 1140_F30Y4              | F30-Y4         | Aa      | amino acids pairs from Rubredoxine |
| 1141_F49C39             | F49-C39        | Aa      | amino acids pairs from Rubredoxine |
| 1142_F49C6              | F49-C6         | Aa      | amino acids pairs from Rubredoxine |
| 1143_F49K46             | F49-K46        | Aa      | amino acids pairs from Rubredoxine |
| 1144_F49V5              | F49-V5         | Aa      | amino acids pairs from Rubredoxine |
| 1145_F49W37             | F49-W37        | Aa      | amino acids pairs from Rubredoxine |
| 1146_F49Y4              | F49-Y4         | Aa      | amino acids pairs from Rubredoxine |
| 1147_F49PBY4V5          | F49-PB (Y4V5)  | Aa      | amino acids pairs from Rubredoxine |
| 1148_F49PBV5C6          | F49-PB (V5C6)  | Aa      | amino acids pairs from Rubredoxine |
| 1149_E47K61IU5          | E47-K6 (1IU5)  | Aa      | ion pairs (Glu-Lys salt bridges)   |
| 1150_E49K61BQ9          | E49-K6 (1BQ9)  | Aa      | ion pairs (Glu-Lys salt bridges)   |
| 1151_E54K21SMM          | E54-K2 (1SMM)  | Aa      | ion pairs (Glu-Lys salt bridges)   |
| 1152_E50K301BRF         | E50-K30 (1BRF) | Aa      | ion pairs (Glu-Lys salt bridges)   |
| 1153_E50K521BRF         | E50-K52 (1BRF) | Aa      | ion pairs (Glu-Lys salt bridges)   |
| 1154_E49K61BRF          | E49-K6 (1BRF)  | Aa      | ion pairs (Glu-Lys salt bridges)   |

\*The abbreviation used in first column are same as in the original reference. For the amino acid pairs the last eight complexes also contains the PDB code of the protein from where that were obtained.

Table VIII: Description of type of interaction present in molecular geometries of S66 dataset

| Complex                | Type of Interaction |
|------------------------|---------------------|
| <b>Hydrogen bonded</b> |                     |
| 01.Water-Water.xyz     | Hbond               |
| 02.Water-MeOH.xyz      | Hbond               |
| 03.Water-MeNH2.xyz     | Hbond               |
| 04.Water-Peptide.xyz   | Hbond               |

Table VIII (*continued*)

|                                  |            |
|----------------------------------|------------|
| 05_MeOH-MeOH.xyz                 | Hbond      |
| 06_MeOH-MeNH2.xyz                | Hbond      |
| 07_MeOH-Peptide.xyz              | Hbond      |
| 08_MeOH-Water.xyz                | Hbond      |
| 09_MeNH2-MeOH.xyz                | Hbond      |
| 10_MeNH2-MeNH2.xyz               | Hbond      |
| 11_MeNH2-Peptide.xyz             | Hbond      |
| 12_MeNH2-Water.xyz               | Hbond      |
| 13_Peptide-MeOH.xyz              | Hbond      |
| 14_Peptide-MeNH2.xyz             | Hbond      |
| 15_Peptide-Peptide.xyz           | Hbond      |
| 16_Peptide-Water.xyz             | Hbond      |
| 17_Uracil-Uracil.xyz             | Hbond      |
| 18_Water-Pyridine.xyz            | Hbond      |
| 19_MeOH-Pyridine.xyz             | Hbond      |
| 20_AcOH-AcOH.xyz                 | Hbond      |
| 21_AcNH2-AcNH2.xyz               | Hbond      |
| 22_AcOH-Uracil.xyz               | Hbond      |
| 23_AcNH2-Uracil.xyz              | Hbond      |
| <b>Dispersion Dominated</b>      |            |
| 24_Benzene-Benzene-pi.xyz        | Dispersion |
| 25_Pyridine-Pyridine-pi.xyz      | Dispersion |
| 26_Uracil-Uracil-pi.xyz          | Dispersion |
| 27_Benzene-Pyridine-pi.xyz       | Dispersion |
| 28_Benzene-Uracil-pi.xyz         | Dispersion |
| 29_Pyridine-Uracil-pi.xyz        | Dispersion |
| 30_Benzene-Ethene.xyz            | Dispersion |
| 31_Uracil-Ethene.xyz             | Dispersion |
| 32_Uracil-Ethyne.xyz             | Dispersion |
| 33_Pyridine-Ethene.xyz           | Dispersion |
| 34_Pentane-Pentane.xyz           | Dispersion |
| 35_Neopentane-Pentane.xyz        | Dispersion |
| 36_Neopentane-Neopentane.xyz     | Dispersion |
| 37_Cyclopentane-Neopentane.xyz   | Dispersion |
| 38_Cyclopentane-Cyclopentane.xyz | Dispersion |
| 39_Benzene-Cyclopentane.xyz      | Dispersion |
| 40_Benzene-Neopentane.xyz        | Dispersion |
| 41_Uracil-Pentane.xyz            | Dispersion |

Table VIII (*continued*)

---

|                                  |            |
|----------------------------------|------------|
| 42_Uracil-Cyclopentane.xyz       | Dispersion |
| 43_Uracil-Neopentane.xyz         | Dispersion |
| 44_Ethene-Pentane.xyz            | Dispersion |
| 45_Ethyne-Pentane.xyz            | Dispersion |
| 46_Peptide-Pentane.xyz           | Dispersion |
| <b>Mixed type of interaction</b> |            |
| 47_Benzene-Benzene.xyz           | Mixed      |
| 48_Pyridine-Pyridine.xyz         | Mixed      |
| 49_Benzene-Pyridine.xyz          | Mixed      |
| 50_Benzene-Ethyne-pi.xyz         | Mixed      |
| 51_Ethyne-Ethyne.xyz             | Mixed      |
| 52_Benzene-AcOH-pi.xyz           | Mixed      |
| 53_Benzene-AcNH2-pi.xyz          | Mixed      |
| 54_Benzene-Water-pi.xyz          | Mixed      |
| 55_Benzene-MeOH-pi.xyz           | Mixed      |
| 56_Benzene-MeNH2-pi.xyz          | Mixed      |
| 57_Benzene-Peptide-pi.xyz        | Mixed      |
| 58_Pyridine-Pyridine-N.xyz       | Mixed      |
| 59_Ethyne-Water-O.xyz            | Mixed      |
| 60_Ethyne-AcOH-pi.xyz            | Mixed      |
| 61_Pentane-AcOH.xyz              | Mixed      |
| 62_Pentane-AcNH2.xyz             | Mixed      |
| 63_Benzene-AcOH.xyz              | Mixed      |
| 64_Peptide-Ethene.xyz            | Mixed      |
| 65_Pyridine-Ethyne.xyz           | Mixed      |
| 66_MeNH2-Pyridine.xyz            | Mixed      |

---

## References

- [1] M. Dupuis, J. Rys, and H. F. King. Evaluation of molecular integrals over gaussian basis functions. *J. Chem. Phys.*, 65:111–16., 1976.
